# Supplementary material for: A sample preparation workflow for adipose tissue shotgun proteomics and proteogenomics
Source: PubMed Central journal article supplement (PMC6262853; doi:10.1242/bio.036731), 2018-10-25
Supplement: biolopen-7-036731-s1.pdf [file biolopen-7-036731-s1.pdf]

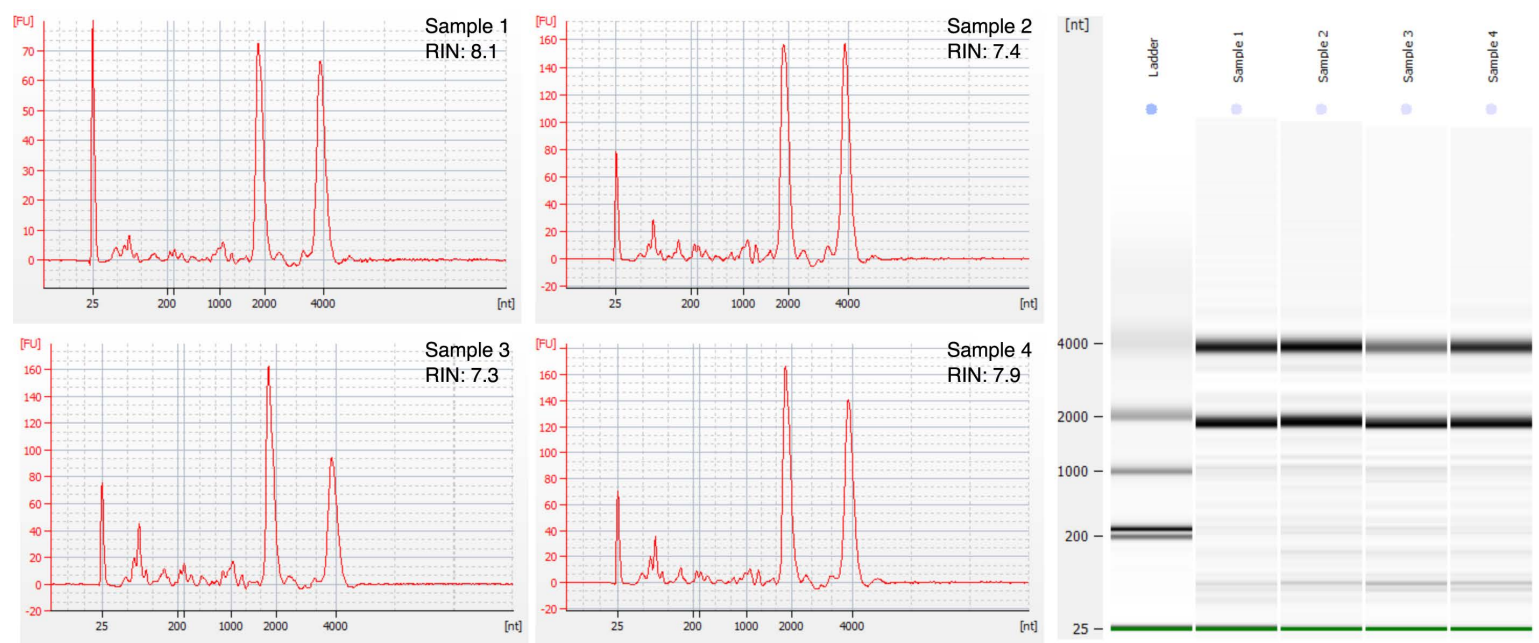

**Figure S1.** Microcapillary gel electrophoresis data for total RNA isolated using QIA from four elephant seal blubber samples described in the study. The electropherograms and gel image were produced using the 6000 Pico Assay on a Bioanalyzer 2100 instrument.

**Table S1.** Tandem mass spectrometry (MS/MS) settings used in the study.

| <b>MS1</b>              |                         |
|-------------------------|-------------------------|
| Isolation mode          | Quadrupole              |
| Detector type           | Orbitrap                |
| Orbitrap resolution     | 120,000                 |
| Mass range              | normal                  |
| Scan range (m/z)        | 300-1500 Da             |
| RF lens                 | 60%                     |
| AGC target              | 1,000,000               |
| Max injection time      | 50 ms                   |
| Monoisotopic precursor  | peptide                 |
| Intensity threshold     | 25,000                  |
| Include charge state    | 2-7                     |
| Dynamic exclusion after | 1 time                  |
| Exclusion duration      | 10 sec                  |
| Mass tolerance          | 10 ppm                  |
| Decisions               | top speed, most intense |
| Scan time               | 15-115 min              |
| Cycle time              | 2 s                     |
| <b>MS2</b>              |                         |
| Isolation mode          | Quadrupole              |
| Isolation window (m/z)  | 1.2 Da                  |
| HCD collision energy    | 28 ± 3%, stepped        |
| Detector type           | Orbitrap                |
| Orbitrap resolution     | 15,000                  |
| Scan range mode         | normal                  |
| First mass (m/z)        | 100 Da                  |
| AGC target              | 500,000                 |
| Max injection time      | 80 ms                   |

**Table S2.** Database search parameters for peptide and protein identification.

|                               |                                                                                            |            |
|-------------------------------|--------------------------------------------------------------------------------------------|------------|
| Software                      | Proteome Discoverer 2.2                                                                    | PEAKS v8.5 |
| Search engine                 | SEQUEST                                                                                    | PEAKS DB   |
| Databases                     | UniProt SwissProt (2/13/2018)<br>Translated blubber transcriptome (Khudyakov et al., 2017) |            |
| Parent mass error tolerance   | 4.0 ppm                                                                                    |            |
| Fragment mass error tolerance | 0.02 Da                                                                                    |            |
| Precursor mass search type    | monoisotopic                                                                               |            |
| Enzyme                        | Trypsin, max. 2 missed cleavages                                                           |            |
| Fixed modifications           | Carbamidomethylation (C)                                                                   |            |
| Variable modifications        | Oxidation (M)<br>Deamidation (NQ)<br>Max 3 mod. per peptide                                |            |
| Contaminant database          | CRAPome (Mellacheruvu et al., 2013)                                                        |            |
| False discovery rate (FDR)    | 1%                                                                                         |            |

**Table S3.** Fifteen elephant seal proteins of interest identified in the study.

| <b>UniProt Accession</b> | <b>Gene name</b>                                   | <b>Pathway or Process</b>       |
|--------------------------|----------------------------------------------------|---------------------------------|
| Q3Y5Z3                   | adiponectin (ADIPOQ)                               | adipocytokine signaling pathway |
| P16671                   | CD36 molecule (CD36)                               | adipocytokine signaling pathway |
| O60240                   | perilipin 1 (PLIN1)                                | regulation of lipolysis         |
| Q96Q06                   | perilipin 4 (PLIN4)                                | PPAR signaling pathway          |
| Q9BX66                   | sorbin and SH3 domain containing 1 (SORBS1)        | PPAR signaling pathway          |
| Q99685                   | monoglyceride lipase (MGLL)                        | triacylglycerol degradation     |
| Q05469                   | lipase E, hormone sensitive type (LIPE)            | triacylglycerol degradation     |
| P06858                   | lipoprotein lipase (LPL)                           | lipid degradation               |
| P02647                   | apolipoprotein A1 (APOA1)                          | cholesterol metabolism          |
| P30084                   | enoyl-CoA hydratase, short chain 1 (ECHS1)         | fatty acid beta-oxidation       |
| P09110                   | acetyl-CoA acyltransferase 1 (ACAA1)               | fatty acid metabolism           |
| P49327                   | fatty acid synthase (FASN)                         | fatty acid biosynthesis         |
| Q53GQ0                   | hydroxysteroid 17-beta dehydrogenase 12 (HSD17B12) | androgen biosynthesis           |
| P04117                   | fatty acid-binding protein, adipocyte (FABP4)      | lipid transport                 |
| Q8HXP2                   | superoxide dismutase, mitochondrial (SOD2)         | superoxide metabolism           |
